# Supplementary material for: Mechanistic Insights into Anion-Induced Electrochromism of Ru(II)-Based Metallo-Supramolecular Polymer
Source: MDPI journal article supplement (doi:10.3390/polym15244735), 2023-12-18
Supplement: s1 [file s1]

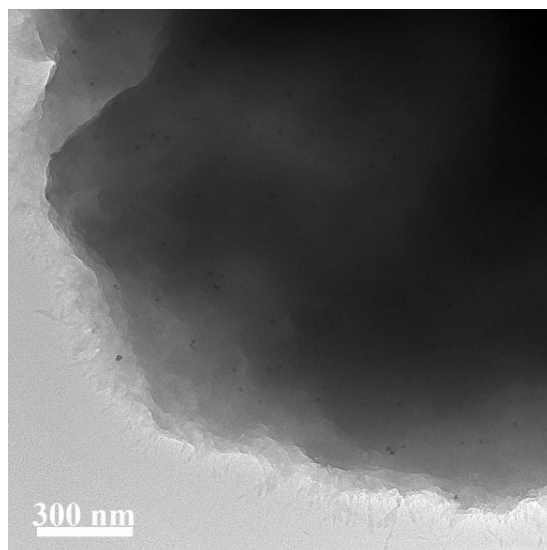

**Figure S1.** The TEM image of polyRu.

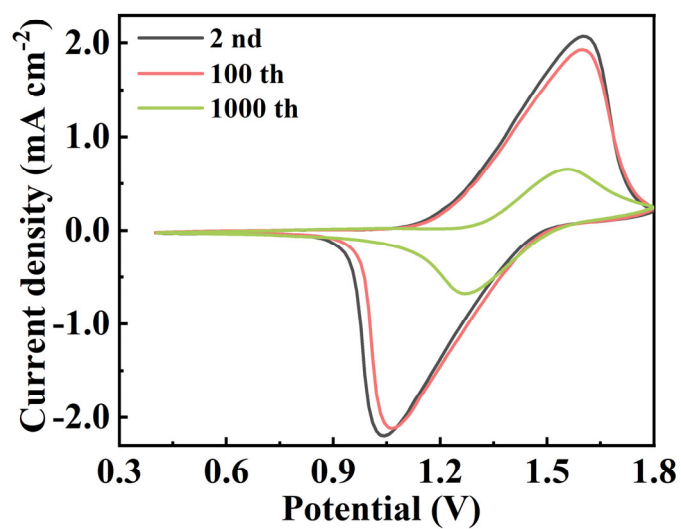

**Figure S2.** The cyclic voltammetry curves of the initial polyRu film and the polyRu films treated by CV after 100 and 1000 cycles.

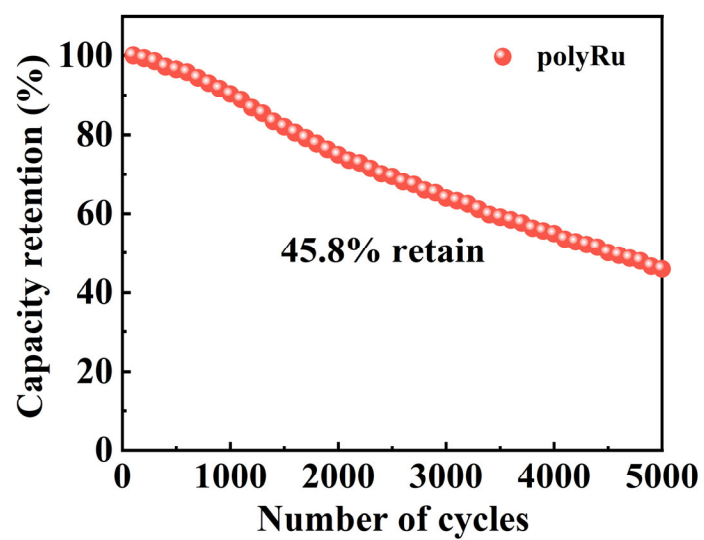

**Figure S3.** Stability over 5000 charge/discharge cycles.

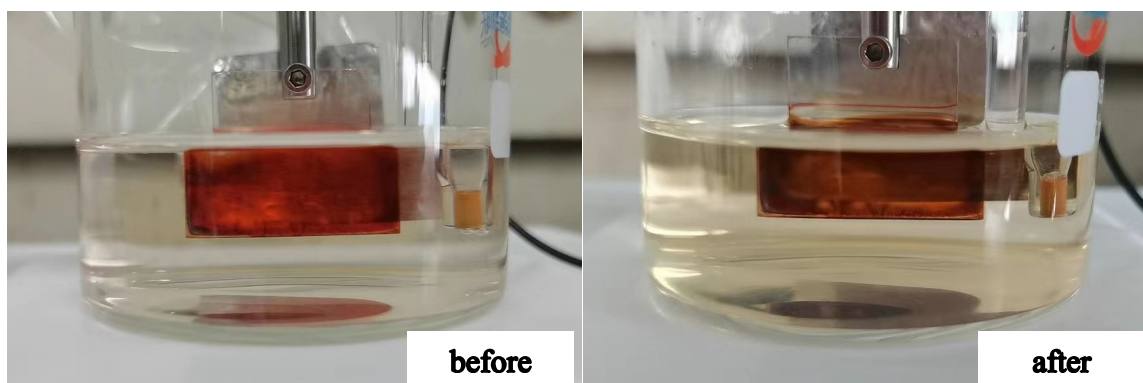

**Figure S4.** Digital photographs of the electrolyte before and after long-term cycling.

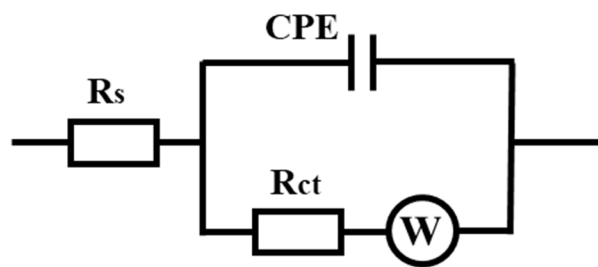

**Figure S5.** The typical equivalent circuit used to fit the EIS spectra.

**Table S1.** The value of parameters in EIS spectra of the polyRu film at various potentials.

| Potential (V) | R <sub>ct</sub> ( $\Omega$ ) | R <sub>s</sub> ( $\Omega$ ) |
|---------------|------------------------------|-----------------------------|
| 0.4           | 76.42k                       | 41.91                       |
| 0.5           | 81.85k                       | 42.23                       |
| 0.6           | 84.92k                       | 42.22                       |
| 0.7           | 29.80k                       | 43.36                       |
| 0.8           | 3.05k                        | 42.70                       |
| 0.9           | 2.61k                        | 41.77                       |
| 1.0           | 3.56k                        | 41.42                       |
| 1.1           | 399.20                       | 41.80                       |
| 1.2           | 141.10                       | 42.63                       |
| 1.3           | 29.25                        | 41.60                       |
| 1.4           | 7.67                         | 37.41                       |
| 1.5           | 4.57                         | 41.25                       |
| 1.6           | 7.92                         | 41.54                       |
| 1.7           | 79.59                        | 43.43                       |
| 1.8           | 824.40                       | 44.32                       |
